# Supplementary material
Source: PubMed Central journal article supplement (PMC3313633)
Supplement: peds.2011-1402_s1.pdf [file peds.2011-1402_s1.pdf]

## Supplemental Information

**SUPPLEMENTAL TABLE 5** Demographics for Total Sample and BMI Present Sample

|                                               | Total Sample <sup>a</sup><br><i>n</i> = 13 467 | With BMI Z Score at<br>42 mo <i>n</i> = 8410 | Without BMI Z score at<br>42 mo <i>n</i> = 5057 |
|-----------------------------------------------|------------------------------------------------|----------------------------------------------|-------------------------------------------------|
| <b>Maternal</b>                               |                                                |                                              |                                                 |
| Smoked during pregnancy, any                  | 25.0%                                          | 23.0%                                        | 28.4% <sup>b</sup>                              |
| Alcohol during pregnancy, any                 | 54.6%                                          | 54.7%                                        | 54.4%                                           |
| Fish intake during pregnancy,<br>mean (SD)    | 1.87 (1.75)                                    | 1.83 (1.74)                                  | 1.89 (1.75)                                     |
| Age at delivery, mean y (SD)                  | 27.96 (4.98)                                   | 28.17 (4.84)                                 | 27.59 (5.18) <sup>b</sup>                       |
| Breastfed this child, ever                    | 75.5%                                          | 75.9%                                        | 74.8%                                           |
| <b>Child</b>                                  |                                                |                                              |                                                 |
| Gender, male                                  | 51.5%                                          | 51.8%                                        | 51.0%                                           |
| Race, white                                   | 97.4%                                          | 97.9%                                        | 96.4% <sup>b</sup>                              |
| Premature, <37 wk                             | 4.9%                                           | 4.5%                                         | 5.6% <sup>b</sup>                               |
| Low birth weight, <2500 g                     | 4.3%                                           | 4.2%                                         | 4.4%                                            |
| Adenoids removed, ever                        | 7.4%                                           | 7.2%                                         | 8.0%                                            |
| Tonsils removed, ever                         | 4.5%                                           | 4.5%                                         | 4.6%                                            |
| BMI z score at 42 mo                          | 0.27 (1.06)                                    | 0.24 (1.06)                                  |                                                 |
| <b>Socioeconomic and family</b>               |                                                |                                              |                                                 |
| Maternal education, <sup>c</sup> Lower (%)    | 64.6%                                          | 65.6%                                        | 62.9% <sup>b</sup>                              |
| Paternal employment, manual (%)               | 44.0%                                          | 44.5%                                        | 43.1%                                           |
| Housing, inadequate, (%)                      | 12.3%                                          | 11.4%                                        | 14.0% <sup>b</sup>                              |
| Family Adversity Index, mean<br>(range: 0–18) | 1.77 (1.98)                                    | 1.70 (1.92)                                  | 1.88 (2.06) <sup>b</sup>                        |
| HOME score, mean (range: 0–8)                 | 5.74 (1.66)                                    | 5.78 (1.62)                                  | 5.65 (1.73) <sup>b</sup>                        |
| Parity ≥1                                     | 55.1%                                          | 54.2%                                        | 56.7% <sup>b</sup>                              |

*P* values are calculated from  $\chi^2$  test for categorical variables and analysis of variance for continuous variables. HOME, Home Observation for Measurement of the Environment.

<sup>a</sup> These 13c467 constitute the base sample used to derive the clusters and SDQ outcomes.

<sup>b</sup> *P* < .01 comparing the with BMI and without BMI groups.

<sup>c</sup> Lower defined as “0” level education or less (equivalent to school-leaving certificate at 16 in the United Kingdom), from 5 original groupings.

**SUPPLEMENTAL TABLE 6** Association Between Early Clusters (n = 11 049) and Potential Confounders

|                                                        | Peak at 6<br>n = 2277<br>(20.6%) (1) | Peak at 18<br>n = 1881<br>(17.0%) (2) | Worst Case<br>n = 878<br>(8.0%) (3) | Late Symptom<br>n = 1023<br>(9.3%) (4) | Normals<br>n = 4990<br>(45.2%) (5) |
|--------------------------------------------------------|--------------------------------------|---------------------------------------|-------------------------------------|----------------------------------------|------------------------------------|
| <b>Maternal characteristics</b>                        |                                      |                                       |                                     |                                        |                                    |
| Smoked during pregnancy, any <sup>a</sup>              | 24.7%                                | 25.0%                                 | 30.4%                               | 28.6%                                  | 18.1%                              |
| Alcohol during pregnancy, any <sup>b</sup>             | 53.3%                                | 53.8%                                 | 55.7%                               | 54.1%                                  | 56.8%                              |
| Fish intake during pregnancy, mean                     | 1.86 (1.70)                          | 1.82 (1.69)                           | 1.89 (1.74)                         | 2.00 (1.88)                            | 1.86 (1.75)                        |
| Age at delivery, mean y <sup>a</sup>                   | 28.33 (4.78)                         | 28.08 (4.85)                          | 27.69 (4.95)                        | 27.70 (4.89)                           | 28.90 (4.66)                       |
| Breastfed this child, ever <sup>a</sup>                | 75.5%                                | 76.0%                                 | 69.8%                               | 73.2%                                  | 78.7%                              |
| <b>Child characteristics</b>                           |                                      |                                       |                                     |                                        |                                    |
| Gender, male <sup>a</sup>                              | 53.2%                                | 52.5%                                 | 56.2%                               | 52.9%                                  | 49.2%                              |
| Race, white <sup>a</sup>                               | 98.3%                                | 96.9%                                 | 97.6%                               | 97.5%                                  | 98.2%                              |
| Premature, <37 wk <sup>a</sup>                         | 4.7%                                 | 4.3%                                  | 6.5%                                | 6.2%                                   | 4.2%                               |
| Low birth weight, <2500 g <sup>a</sup>                 | 3.4%                                 | 4.7%                                  | 4.5%                                | 5.2%                                   | 3.3%                               |
| BMI z score at 42 mo                                   | 0.27 (1.04)                          | 0.33 (1.07)                           | 0.25 (1.14)                         | 0.25 (1.12)                            | 0.25 (1.03)                        |
| <b>Socioeconomic and family characteristics</b>        |                                      |                                       |                                     |                                        |                                    |
| Maternal education, Lower (%) <sup>a</sup>             | 65.0%                                | 66.2%                                 | 67.8%                               | 68.4%                                  | 58.4%                              |
| Paternal employment, manual (%) <sup>a</sup>           | 42.9%                                | 45.8%                                 | 47.0%                               | 46.2%                                  | 39.1%                              |
| Housing, inadequate (%) <sup>a</sup>                   | 14.7%                                | 15.0%                                 | 17.3%                               | 13.3%                                  | 9.8%                               |
| Family Adversity Index mean (range: 0–18) <sup>a</sup> | 2.12 (2.09)                          | 2.10 (2.04)                           | 2.50 (2.32)                         | 2.19 (2.14)                            | 1.61 (1.81)                        |
| HOME score, mean (range: 0–8)                          | 5.72 (1.66)                          | 5.72 (1.66)                           | 5.71 (1.68)                         | 5.70 (1.66)                            | 5.80 (1.64)                        |
| Parity, ≥1                                             | 55.0%                                | 53.8%                                 | 54.6%                               | 52.5%                                  | 55.4%                              |

P values are calculated from  $\chi^2$  test for categorical variables and analysis of variance for continuous variables. HOME, Home Observation for Measurement of the Environment.

<sup>a</sup> P < .01 for difference between top 10% versus lower 90%.

<sup>b</sup> P < .05 for difference between top 10% versus lower 90%.

**SUPPLEMENTAL TABLE 7** ORs and 95% CIs for Unadjusted Cluster Effects on SDQ Total and Subscales at 4 and 7 Years

|                                           | Early Cluster Models          |                               | Later Cluster Models          |
|-------------------------------------------|-------------------------------|-------------------------------|-------------------------------|
|                                           | 4 y                           | 7 y                           | 7 y                           |
| Top 10% vs Lower 90%<br>OR (95% CI)       |                               |                               |                               |
| SDQ Total                                 |                               |                               |                               |
| Peak @ 6 (1)                              | 1.41 (1.20–1.67) <sup>a</sup> | 1.50 (1.24–1.81) <sup>a</sup> | 1.64 (1.32–2.02) <sup>a</sup> |
| Peak @ 18 mo (2)                          | 1.58 (1.33–1.87) <sup>a</sup> | 1.62 (1.32–1.97) <sup>a</sup> | 1.67 (1.37–2.04) <sup>a</sup> |
| Worst Case (3)                            | 2.06 (1.66–2.56) <sup>a</sup> | 2.34 (1.83–2.99) <sup>a</sup> | 2.45 (1.92–3.13) <sup>a</sup> |
| Late Symptom (4)                          | 2.17 (1.77–2.66) <sup>a</sup> | 1.81 (1.41–2.31) <sup>a</sup> | 2.04 (1.67–2.50) <sup>a</sup> |
| Normal (5)                                | Reference                     | Reference                     | Reference                     |
| Symptomatic (1, 2, 3, 4) vs<br>Normal (5) | 1.67 (1.47–1.89) <sup>a</sup> | 1.70 (1.46–1.96) <sup>a</sup> | 1.86 (1.60–2.16) <sup>a</sup> |
| Pro-social                                |                               |                               |                               |
| Peak @ 6 (1)                              | 1.36 (1.14–1.64) <sup>a</sup> | 1.37 (1.13–1.66) <sup>a</sup> | 1.38 (1.12–1.70) <sup>a</sup> |
| Peak @ 18 mo (2)                          | 1.16 (0.95–1.42)              | 1.39 (1.14–1.71) <sup>a</sup> | 1.24 (1.02–1.52) <sup>b</sup> |
| Worst Case (3)                            | 1.26 (0.96–1.66)              | 1.40 (1.06–1.85) <sup>b</sup> | 1.15 (0.86–1.53)              |
| Late Symptom (4)                          | 0.99 (0.75–1.31)              | 0.93 (0.69–1.27)              | 0.90 (0.71–1.15)              |
| Hyperactivity                             |                               |                               |                               |
| Peak @ 6 (1)                              | 1.42 (1.21–1.66) <sup>a</sup> | 1.64 (1.36–1.97) <sup>a</sup> | 1.70 (1.38–2.10) <sup>a</sup> |
| Peak @ 18 mo (2)                          | 1.39 (1.17,1.65) <sup>a</sup> | 1.57 (1.28–1.92) <sup>a</sup> | 1.57 (1.28–1.92) <sup>a</sup> |
| Worst Case (3)                            | 1.96 (1.59–2.42) <sup>a</sup> | 2.54 (1.99–3.23) <sup>a</sup> | 2.28 (1.78–2.93) <sup>a</sup> |
| Late Symptom (4)                          | 1.75 (1.42–2.14) <sup>a</sup> | 1.85 (1.44–2.37) <sup>a</sup> | 2.00 (1.63–2.45) <sup>a</sup> |
| Emotional                                 |                               |                               |                               |
| Peak @ 6 (1)                              | 1.31 (1.10–1.57) <sup>a</sup> | 1.43 (1.20–1.70) <sup>a</sup> | 1.61 (1.33–1.96) <sup>a</sup> |
| Peak @ 18 mo (2)                          | 1.34 (1.10–1.62) <sup>a</sup> | 1.43 (1.19–1.72) <sup>a</sup> | 1.53 (1.28–1.84) <sup>a</sup> |
| Worst Case (3)                            | 1.57 (1.22–2.01) <sup>a</sup> | 1.67 (1.31–2.13) <sup>a</sup> | 1.82 (1.42–2.32) <sup>a</sup> |
| Late Symptom (4)                          | 1.65 (1.31–2.08) <sup>a</sup> | 1.54 (1.22–1.96) <sup>a</sup> | 1.85 (1.53–2.24) <sup>a</sup> |
| Conduct                                   |                               |                               |                               |
| Peak @ 6 (1)                              | 1.66 (1.41–1.95) <sup>a</sup> | 1.53 (1.27–1.85) <sup>a</sup> | 1.48 (1.19–1.83) <sup>a</sup> |
| Peak @ 18 mo (2)                          | 1.47 (1.23–1.75) <sup>a</sup> | 1.51 (1.24–1.85) <sup>a</sup> | 1.62 (1.33–1.97) <sup>a</sup> |
| Worst Case (3)                            | 1.86 (1.49–2.33) <sup>a</sup> | 1.94 (1.50–2.51) <sup>a</sup> | 1.95 (1.51–2.52) <sup>a</sup> |
| Late Symptom (4)                          | 2.02 (1.64–2.48) <sup>a</sup> | 1.45 (1.12–1.90) <sup>a</sup> | 1.60 (1.30–1.98) <sup>a</sup> |
| Peer                                      |                               |                               |                               |
| Peak @ 6 (1)                              | 1.35 (1.13–1.62) <sup>a</sup> | 1.33 (1.12–1.57) <sup>a</sup> | 1.34 (1.10–1.62) <sup>a</sup> |
| Peak @ 18 mo (2)                          | 1.29 (1.06–1.57) <sup>b</sup> | 1.38 (1.15–1.65) <sup>a</sup> | 1.43 (1.20–1.70) <sup>a</sup> |
| Worst Case (3)                            | 1.60 (1.25–2.04) <sup>a</sup> | 1.76 (1.39–2.22) <sup>a</sup> | 1.72 (1.36–2.18) <sup>a</sup> |
| Late Symptom (4)                          | 1.35 (1.06–1.72) <sup>b</sup> | 1.39 (1.10–1.76) <sup>a</sup> | 1.39 (1.15–1.69) <sup>a</sup> |

<sup>a</sup>  $P < .01$  for difference between top 10% versus lower 90%.<sup>b</sup>  $P < .05$  for difference between top 10% versus lower 90%.

**SUPPLEMENTAL TABLE 8** Cluster Effects on SDQ Total Scores at 4 and 7 Years

| Top 10% vs Lower 90%<br>OR (95% CI)  | Early Cluster Models          |                                | Later Cluster Models           |
|--------------------------------------|-------------------------------|--------------------------------|--------------------------------|
|                                      | 4 y <sup>a</sup><br>n = 6111  | 7 y <sup>a,b</sup><br>n = 5473 | 7 y <sup>a,b</sup><br>n = 5517 |
| Adjusted with BMI <sup>c</sup>       |                               |                                |                                |
| Peak @ 6 (1)                         | 1.09 (0.87–1.36)              | 1.21 (0.95–1.54)               | 1.37 (1.04–1.79) <sup>e</sup>  |
| Peak @ 18 mo (2)                     | 1.24 (0.98–1.57)              | 1.21 (0.93–1.58)               | 1.35 (1.04–1.76) <sup>e</sup>  |
| Worst Case (3)                       | 1.59 (1.18–2.13) <sup>d</sup> | 1.70 (1.23–2.36) <sup>d</sup>  | 1.86 (1.35–2.57) <sup>d</sup>  |
| Late Symptom (4)                     | 1.73 (1.32–2.27) <sup>d</sup> | 1.15 (0.82–1.62)               | 1.56 (1.18–2.05) <sup>d</sup>  |
| BMI z score @ 42 mo                  | 0.94 (0.87–1.02)              | 1.03 (0.94–1.12)               | 1.03 (0.94–1.12)               |
| Smoking during pregnancy             | NS                            | NS                             | NS                             |
| Gender, male                         | NS                            | 1.34 (1.11–1.62) <sup>d</sup>  | 1.35 (1.12–1.63) <sup>d</sup>  |
| Maternal education, lower            | 1.50 (1.24–1.81) <sup>d</sup> | 1.31 (1.07–1.59) <sup>d</sup>  | 1.28 (1.05–1.56) <sup>e</sup>  |
| Paternal employment, manual          | 1.42 (1.20–1.89) <sup>d</sup> | NS                             | NS                             |
| Family Adversity Index               | 1.19 (1.14–1.23) <sup>d</sup> | 1.26 (1.20–1.31) <sup>d</sup>  | 1.25 (1.20–1.31) <sup>d</sup>  |
| Home score                           | NS                            | 0.90 (0.85–0.95) <sup>d</sup>  | 0.90 (0.85–0.96) <sup>d</sup>  |
| Parity 1 vs 0 ≥2 vs 0                | NS                            | 0.70 (0.56–0.86) <sup>d</sup>  | 0.70 (0.58–0.87) <sup>d</sup>  |
|                                      | NS                            | 0.60 (0.43–0.75) <sup>d</sup>  | 0.57 (0.44–0.75) <sup>d</sup>  |
| Clusters 1, 2, 3, & 4 vs Normals (5) | 1.27 (1.07–1.51) <sup>d</sup> | 1.27 (1.05–1.53) <sup>e</sup>  | 1.44 (1.13–1.83) <sup>d</sup>  |

HOME, Home Observation for Measurement of the Environment; NS, not significant.

<sup>a</sup> Adjusted for fish intake, Family Adversity Index, mother and home score, smoke during pregnancy, alcohol during pregnancy, race, breastfeeding ever, housing inadequacy, parity, gestation age, paternal social, maternal education, birth weight, maternal age, gender.

<sup>b</sup> Additional adjusted for tonsils or adenoids removed.

<sup>c</sup> Covariates shown are only those that were significant ( $P < .05$ ) in reduced models with each of the 4 symptomatic models incorporated as a separate variable (versus combined clusters 1, 2, 3, and 4).

<sup>d</sup>  $P < .01$ .

<sup>e</sup>  $P < .05$ .
